# Supplementary material for: MiRAR—miRNA Activity Reporter for Living Cells
Source: PubMed Central journal article supplement (PMC6027049; doi:10.3390/genes9060305), 2018-06-19
Supplement: genes-09-00305-s001.pdf [file genes-09-00305-s001.pdf]

Reporter gene constructs:

1. KRAS 3'-UTR into GFP-pcDNA3.1

5'AAGCTTATGGGCAGCAGCCATCATCATCATCACAGCAGCGGCCTGGTGCCGCGCGGCAGC  
CGTACGATGAGCAAAGGAGAAGAAGCTTTTCACTGGAGTTGTCCCAATTCTTGTGAATTAGA  
TGGTGATGTTAATGGGCACAAATTTTCTGTCCGTGGAGAGGGTGAAGGTGATGCTACAAAC  
GGAAAACCTCACCTTAAATTTATTTGCACTACTGGAAAACCTACCTGTTCCATGGCCAACACTT  
GTCACTACTCTGACCTATGGTGTTCATGCTTTTCCCGTTATCCCGATCACATGAAACGGCAT  
GACTTTTTCAAGAGTGCCATGCCCGAAGGTTATGTACAGGAACGCACTATATCTTTCAAAGA  
TGACGGGACCTACAAGACGCGTGCTGAAGTCAAGTTTGAAGGTGATACCCTTGTTAATCGTA  
TCGAGTTAAAAGGTATTGATTTTAAAGAAGATGGAAACATTCTCGGACACAAACTCGAGTAC  
AACTTTAACTCACACAATGTATACATCACGGCAGACAAAACAAAAGAATGGAATCAAAGCTAA  
CTTCAAATTCGCCACAACGTTGAAGATGGTTCCGTTCAACTAGCAGACCATTATCAACAAA  
ATACTCCAATTGGCGATGGCCCTGTCTTTTACCAGACAACCATTACCTGTGACACAATCTG  
TCCTTTCGAAAGATCCCAACGAAAAGCGTGACCACATGGTCCCTTCTTGAGTTTGTAAGTCTG  
GCTGGGATTACACATGGCATGGATGAGCTCTACAAA**GTTAAC**GGTGGCGGTGGCTCTGGAG  
GTGGTGGGTCC**GGTACC**TAA**CGGACGCGTGGGCGGCAGCGCTGTGGCGGCGGCTGAGACGGC**  
**AGGGGAAGGCGGCGGCTCGGCCCGGAGTCCCGCTCCCGCGCCATTCGGACCCGGAGCGA**  
**GCGCGGCGGGCCTGAAGGCGGCGGGAGCCTGAGGCGCGGCGGCTCCGCGGCGCGGAGA**  
**GAGGCCTGCTGAAAATGACTGAGTATAAACTTGTGGTGGTTGGAGCTGGTGGCGTAGGCAAGAG**  
**CGCCTTGACGATACAGCTAATTCAGAATCACTTTGTGGATGAGTACGACCCTACGATAGAGGACT**  
**CCTACAGGAAACAAGTAGTAATTGATGGAGAAACCTGTCTCTGGATATTCTCGACACA**GCAGG****  
**TCAAGAGGAGTACAGTGAATGAGGGACCACTACATGAGAAGTGGGGAGGGCTTTCTTTGTGTA**  
**TTTGCCATAAATAACTAAATCATTGAAGATATTCACCATTATAGAGAACAATAAAAGAGT**  
**AAAGGACTCTGAAGATGTGCCTATGGTCTGGTAGGGAATAAGTGTGATTTGCCTTCTAGAACAG**  
**TAGACACGAAACAGGCTCAGGAGTTAGCAAGGAGTTACGGGATTCCGTTTATTGAGACCTCAGC**  
**AAAGACAAGACAGGGTGTGACGATGCCTTCTATACATTAGTCCGAGAAATTCGAAAACATAAA**  
**GAAAAGATGAGCAAAGATGGGAAGAAGAAGAAGAA**GTCAAGGACAAGGTGTACAGTT****  
**ATGTGAATACTTTGACTCTTTCTTAAGGCACACTTAAGTAAAAGTGTGATTTTTGTACATTAC**  
**TAAATTATTAGCATTGTGTTTAGCATTACCTAATCTTTTTTTTTCTTCTGTTTCGTGCAAACCTGTCAG**  
**CTTTTATCTCAAATGCTTATTTTAAAAGAACAGTGGAAACCTTCTTTTTTCTAAGTGCCAGTATTC**  
**CTGGGTTTTGGACTTAAACTAGCAATGCCTGTGGAAGAGACTAAAGACCTGAGACTCTGTCTTGG**  
**GATTTGGTGCATGCAGTTGATTCCTTGTAGTTCTCTTACCAACTGTGAACACTGATGGGAAGCAG**  
**GATAATGAAGCTCCGGACCATCCCTGCTCTGTGTCCATCTACTCATCCAATGGAGTCATTAGCA**  
**GTCAATCGCAGCTTCACTGGACACTGAGGGTACAGACTTAGGCTCCCTTTGAGTCACGTCCAG**  
**CGTGTCTAGACTTTATCATCTTTCAGAGGCGTAGGCAGACTGTTACAAAGGCTTTCTCTAGCTT**  
**TCCACTGCAATTAATCTTGGTCACTCCCTCAAATAGTATATTTTTCTAGAAAAGGGGAAAAATG**  
**GAAAAAAGGCAATGGAAAATGTTGAAATCCATTCAGTTTCCATGTTAGCTAAATTAC**  
**TGTAAGATTCTATAATAGCTTTTCTGGTAAGGCAGACCCAGTATGAAATAGTAATAACCATTT**  
**GGGCTATATTTACATGCTACTAAATTTTTGTAATAATTCAAACAACCTTAGCATATATAAAAAGTT**  
**CTCATAAGAATTAAGTACA**GGATCC**GACGGATCGGGAGATCTC**

**HIS-tag** GFP, Linker, 3'-UTR, Let-7 binding sites (corresponds to Kumar et al., 2007; miRTarBase, 2018)

## 2. CPEB 3'-UTR into GFP-pcDNA3.1

5'AAGCTTATGGGCAGCAGCCATCATCATCATCACAGCAGCGGCCTGGTGCCGCGCGGCAGC  
CGTACGATGAGCAAAGGAGAAGAAGCTTTTCACTGGAGTTGTCCCAATTCTTGTGAATTAGA  
TGGTGATGTTAATGGGCACAAATTTTCTGTCCGTGGAGAGGGTGAAGGTGATGCTACAAAC  
GGAAAACACCCCTTAAATTTATTTGCACTACTGGAAAACACCTGTTCCATGGCCAACACTT  
GCACTACTCTGACCTATGGTGTTCATGCTTTTCCCGTTATCCCGATCACATGAAACGGCAT  
GACTTTTTCAAGAGTGCCATGCCCGAAGGTTATGTACAGGAACGCACTATATCTTTCAAAGA  
TGACGGGACCTACAAGACGCGTGCTGAAGTCAAGTTTGAAGGTGATACCCTTGTTAATCGTA  
TCGAGTTAAAAGGTATTGATTTTAAAGAAGATGGAAAACATTCTCGGACACAAACTCGAGTAC  
AACTTTAACTCACACAATGTATACATCACGGCAGACAAAACAAAAGAATGGAATCAAAGCTAA  
CTTCAAATTCGCCACAACGTTGAAGATGGTTCGGTCAACTAGCAGACCATTATCAACAAA  
ATACTCCAATTGGCGATGGCCCTGTCTTTTACCAGACAACCATTACCTGTGACACAATCTG  
TCCTTTCGAAAGATCCCAACGAAAAGCGTGACCACATGGTCTTCTTGAGTTTGTAACTGCT  
GCTGGGATTACACATGGCATGGATGAGCTCTACAAA**GTTAAC**GGTGGCGGTGGCTCTGGAG  
GTGGTGGGTCC**GGTACC**TAAAGGAGCTGGCCTTGCCAGTGGCCTGTGGCGCCCAAAGCTGGC  
AGGTCAGGCAAGCAGCCTGCACCACCCTGCCACTGGCGACCAGGGAGCTGGCTTCCCAAGGACA  
AGGGAAAATTGTAGTCACCTTGCACCTGCTGAATCTGTCTTTGTTTCTGCACTAATTAATGCACA  
TTGAGTTTTGTCAGGTTTTGTTTTAGGGGGTGTACCAAGGGCAAGGACCCTCTGGCTTACCCTCC  
AAGCGACTCTGTAGTTTTCCAGATTTTAGTTCCCTCATTTTGCAGATGAAAAGCGGGGAAAAAAA  
AAAAAAAAAAAAAAAAACTACGTGTCCAGAAGGTATTGAGGTATTGACACGGATGCCTACACCTA  
GGTTATTTATT**AAAAGCGCTTTTTTACATTC**TGCAATACTGATGGTGTGATGCGCAGGTCTC  
ATTGGTTTCATTCTTGCAGTTGCCATACAGTGCCTTTCATTTATTTAACCCCCACCTGAACGGCAT  
AACTGAGTGTTCACTGGTGTTTTTTACTGTAAACAATAAGGAGACTTTGCTCTTCATTTAAACC  
AAAATCATATTTATATTTACGCTCGAGGGTTTTT**ACCGGTTCTTTTTTACTCCT**TAAAACAGT  
TTTTAAGTCGTTTGGAAACAAGATATTTTTCTTTCCTGGCAGCTTTTAAACATTATAGCAAATTTGTG  
TCTGGGGGACTGCTGGTCACTGTTTCTCACAGTTGCAAATCAAGGCATTTGCAACCAAGAAAAAA  
AAAATTTTTTGTATTTTAAACTGGACCGGATAAACGGTGTGTTGAGCGGCTGCTGTATATAGTT  
TTAAATGGTTTATTGCACCTCCTTAAGTTGCACTTATGTGGGGGGTGGGGTTGATAGAAGTTTTT  
AATCACAAGTACAGGACTTTTTTCTTTTGTAACTGAGCTAAAAGGGCTGTTTTTCGGTGGGG  
GCAGATGAAGGCTCACAGGAGCCCTTCTCTTAGAGGGGGCAAGTACCCTTCCCTTATATCTTTA  
ATTTGAGGAATGTATGAGATAACAGTTGCAGTTGACTGAAATGCCACTGGAATTTGAAAACCTTGA  
CTTTTTTTCTTTCCTTTTTTTTTTTTTTTTTTTTTTAAAAAGAAACAAAAACCCACAAAAACTAC  
TTGCCCTCCTAGGGAAGCTGTGTGCCAAAGAACCAGTGTGCATAACCCCTCCCTCCTGCTGAGCT  
GACGTTGCATTGTTGCATATCCCAGCTACTCTGTGGGTTTTGTGAAGCTGTGTGTGAAGTCTCTAC  
CTCATTGTAGTATATGCAGGCAAGACTGCACTCTCCTACAGATGTGTGGAGTAAGCTGTGGTGTGA  
GTTTTTTTGGCACATAATAAACACGTTGCAGCAG**GGATCC**GACGGATCGGGAGATCTCCCGATCC  
CCTATGGTCC

**HIS-tag** GFP, Linker, 3'-UTR, miR-122 binding sites (corresponds to Burns et al. 2011)

**GGTACC** – *KpnI*

**GGATCC** – *BamHI*
